# Supplementary material for: Nutraceutical Screening in a Zebrafish Model of Muscular Dystrophy: Gingerol as a Possible Food Aid
Source: PubMed Central journal article supplement (PMC8003371; doi:10.3390/nu13030998), 2021-03-19
Supplement: nutrients-13-00998-s001.pdf [file nutrients-13-00998-s001.pdf]

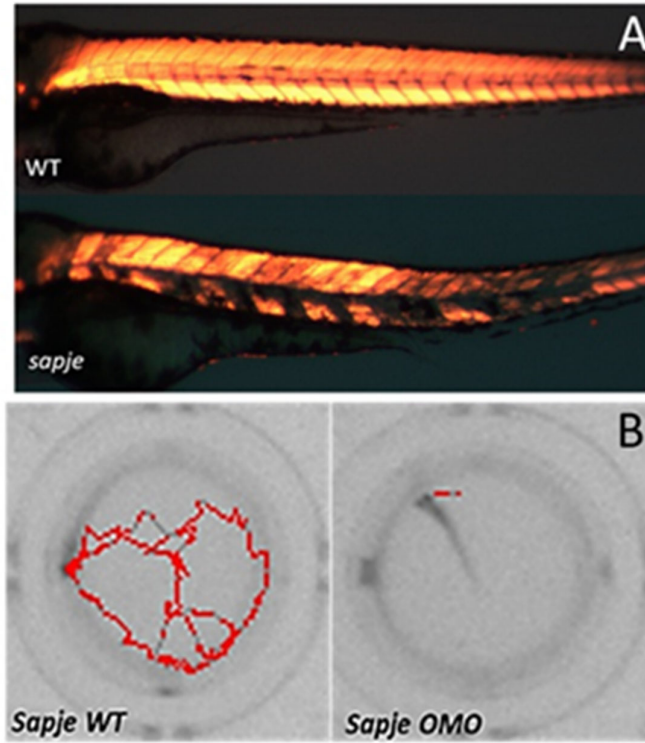

**Figure S1.** Birefringence assay and locomotion tracking. A) Birefringence assay on wild-type-like non-dystrophic heterozygous (WT) and on dystrophic homozygous *sapje* larvae, at 4 days post-fertilization; B) Example of locomotion tracking of WT and homozygous (OMO) *sapje* larvae.

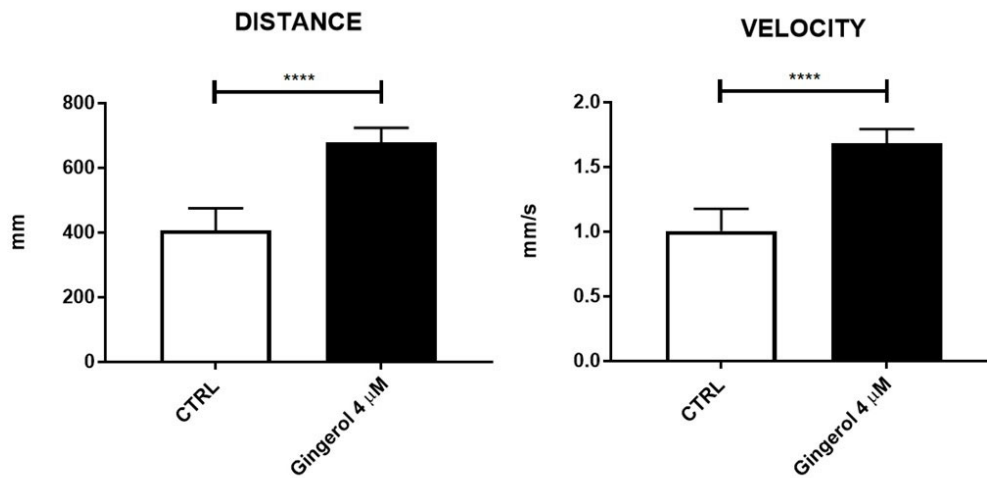

**Figure S2.** The figure illustrated the effects of Gingerol on locomotion (distance and velocity) of untreated (CTRL  $n = 103$ ) and treated with Gingerol 4  $\mu\text{M}$  ( $n = 128$ ), dystrophic homozygous *sapje* larvae at 5 days post-fertilization \*\*\*\*  $p \leq 0.0001$ .

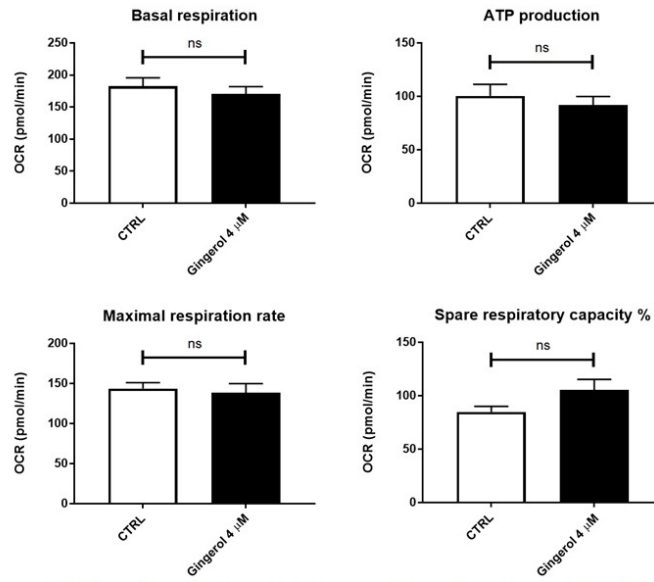

**Figure S3.** Mitochondrial respiration analysis of untreated (CTRL) and treated with Gingerol 4 μM dystrophic homozygous *sapje* larvae at 5 days post-fertilization, ns  $p > 0.05$ .
